# Supplementary material for: Heterostructured CoS2/NiS2 nanoparticles encapsulated in bamboo-like carbon nanotubes as a high performance anode for sodium ion batteries
Source: Royal Society of Chemistry journal article supplement (doi:10.1039/d0nj00941e), 2020-01-01
Supplement: d0nj00941e1.pdf [file d0nj00941e1.pdf]

## Supplementary Information

### **Heterostructured CoS<sub>2</sub>/NiS<sub>2</sub> nanoparticles encapsulated in bamboo-like carbon nanotubes as a high performance anode for sodium ion batteries**

Xiang Yao<sup>a</sup>, Hui Cheng<sup>a</sup>, Zhouyang Jiang<sup>a</sup>, Qingyue Han<sup>a</sup>, Yanjie Wang<sup>b</sup> and Suqing Wang<sup>\*a</sup>

- a. School of Chemistry and Chemical Engineering, Guangdong Provincial Key Lab of Green Chemical Product Technology, South China University of Technology, Guangzhou 510640, P.R. China
- b. R&D Center, Shenzhen Senior Technology Material Co., LTD, Shenzhen 518106, P.R. China

\* The corresponding authors: [cesqwang@scut.edu.cn](mailto:cesqwang@scut.edu.cn)

---

\* Corresponding author

Email: [cesqwang@scut.edu.cn](mailto:cesqwang@scut.edu.cn). Tel./Fax: +86-020- 87111901.

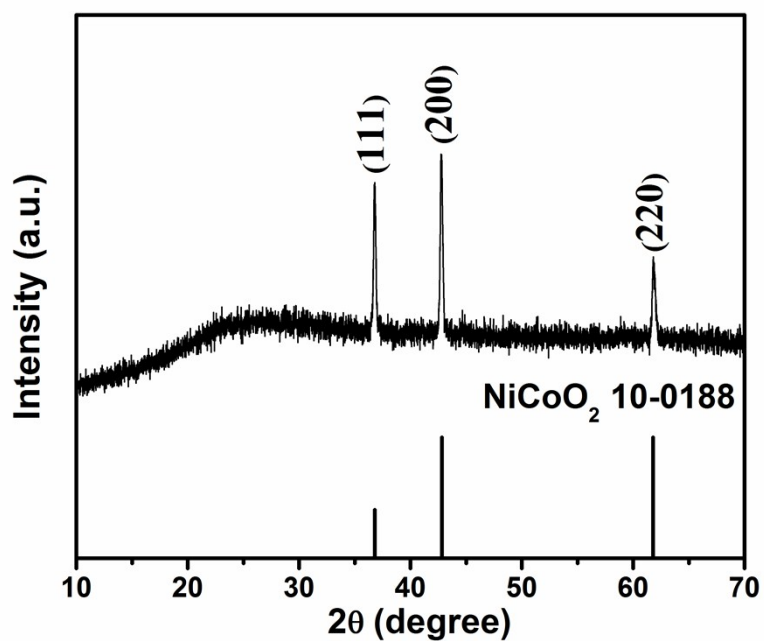

Fig.S1 XRD pattern of the combustion product of CoS<sub>2</sub>/NiS<sub>2</sub>@B-CNT.

$$\begin{aligned}
 \text{CoS}_2/\text{NiS}_2 \text{ (wt\%)} &= \frac{\text{final weight of NiCoO}_2}{\text{total atomic weight of Co/Ni}} \times \frac{\text{total atomic weight of Co/Ni}}{\text{molecular weight of NiCoO}_2} \div \\
 &\frac{\text{molecular weight of CoS}_2/\text{CoS}_2}{\text{molecular weight of NiCoO}_2} \times 100 \quad \% \\
 \text{(eq S1)}
 \end{aligned}$$

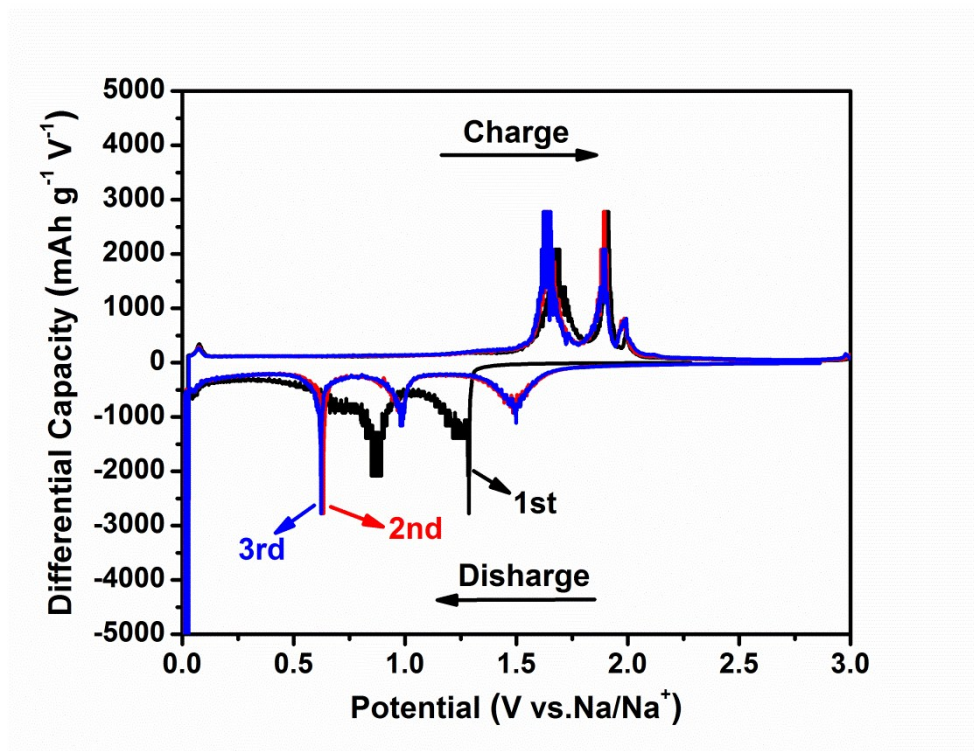

Fig.S2 DQ/DV curves of CoS<sub>2</sub>/NiS<sub>2</sub>@B-CNT

**Table S1.** Comparison of sodium storage performance of various CoS<sub>2</sub> and NiS<sub>2</sub> based anode materials.

| Materials                                                                     | Current density [A g <sup>-1</sup> ] | Cycle number | Specific capacity [mAh g <sup>-1</sup> ] | Current density [A g <sup>-1</sup> ] | Specific capacity [mAh g <sup>-1</sup> ] | Ref.      |
|-------------------------------------------------------------------------------|--------------------------------------|--------------|------------------------------------------|--------------------------------------|------------------------------------------|-----------|
| CoS <sub>2</sub> /NiS <sub>2</sub> @B-CNT                                     | 0.1<br>5                             | 50<br>1000   | 604.7<br>497.6                           | 1                                    | 548.8                                    | This work |
|                                                                               |                                      |              |                                          | 2                                    | 534.8                                    |           |
|                                                                               |                                      |              |                                          | 5                                    | 513.0                                    |           |
|                                                                               |                                      |              |                                          | 10                                   | 491.6                                    |           |
| CoS <sub>2</sub> triple-shelled nanoboxes                                     | 0.2                                  | 100          | 454                                      | 5                                    | 346                                      | [S1]      |
| CoS <sub>2</sub> @N-doped carbon nanofibers                                   | 0.1                                  | 200          | 357                                      | 3.2                                  | 201                                      | [S2]      |
| SnS <sub>2</sub> @CoS <sub>2</sub> -rGO                                       | 1                                    | 100          | 309.8                                    | 4                                    | 330                                      | [S3]      |
|                                                                               |                                      |              |                                          | 4                                    | 321                                      |           |
| CoS <sub>2</sub> /Co <sub>4</sub> S <sub>3</sub> @N-doped carbon microspheres | 2<br>4                               | 400<br>1500  | 323<br>256                               | 4                                    | 321                                      | [S4]      |
|                                                                               |                                      |              |                                          | 6                                    | 217                                      |           |
| NiS <sub>2</sub> spheres@graphene                                             | 1                                    | 300          | 530                                      | 2                                    | 527.8                                    | [S5]      |
| NiS <sub>2</sub> @C@C                                                         | 0.1                                  | 100          | 580.8                                    | 1.6                                  | 448                                      | [S6]      |
| NiS <sub>2</sub> nanoparticles/carbon nanofibers                              | 2                                    | 1000         | 140                                      | 2                                    | 300                                      | [S7]      |
| SnS <sub>2</sub> /NiS <sub>2</sub> @carbon cloth                              | 2                                    | 100          | 343.2                                    | 5                                    | 360                                      | [S8]      |

## References

- [S1] X. Wang, Y. Chen, Y. Fang, J. Zhang, S. Gao and X. Lou, *Angew. Chem. Int. Ed.*, 2019, 58, 2675-2679.
- [S2] W. Zhang, Z. Yue, Q. Wang, X. Zeng, C. Fu, Q. Li, X. Li, L. Fang and L. Li, *Chem. Eng. J.*, 2020, 380, 122548.
- [S3] X. Wang, X. Li, Q. Li, H. Li, J. Xu, H. Wang, G. Zhao, L. Lu, X. Lin, H. Li and S. Li, *Nano-Micro Lett.*, 2018, 10, 46.

- [S4] C. Dong, L. Guo, H. Li, B. Zhang, X. Gao, F. Tian, Y. Qian, D. Wang and L. Xu, *Energy Storage Mater.*, 2020, 25, 679-686.
- [S5] R. Bi, C. Zeng, H. Huang, X. Wang and L. Zhang, *J. Mater. Chem. A*, 2018, 6, 14077-14082.
- [S6] G. Zhao, Y. Zhang, L. Yang, Y. Jiang, Y. Zhang, W. Hong, Y. Tian, H. Zhao, J. Hu, L. Zhou, H. Hou, X. Ji and L. Mai, *Adv. Funct. Mater.*, 2018, 28, 1803690.
- [S7] W. Zhao, S. Ci, X. Hu, J. Chen and Z. Wen, *Nanoscale*, 2019, 11, 4688-4695.
- [S8] S. Guan, T. Wang, X. Fu, L.-Z. Fan and Z. Peng, *Appl. Surf. Sci.*, 2020, 508, 145241.
